# Supplementary material
Source: publisher figshare collection journal article supplement (https://sage.figshare.com/ndownloader/files/21245058)
Supplement: Supplementary file 1 [file 21245058]

Archive with 2 entries (2 files):
- Clark_Open_Practices_Disclosure.pdf
- Clark_Supplemental_Material.pdf
