# Supplementary material
Source: publisher figshare collection journal article supplement (https://sage.figshare.com/ndownloader/files/21245058)
Supplement: Supplementary file 1 [file 21245058 › Clark_Supplemental_Material.pdf]

Supplemental Materials and Analyses for Clark, Winegard, Beardslee, Baumeister, and Shariff

(under review):

Declines in Religiosity Predict Increases in Violent Crime Only Among Countries with  
Relatively Low Average IQ

## Table of Contents

|                                                                            |       |
|----------------------------------------------------------------------------|-------|
| Source information (Supplemental Table 1)                                  | p. 2  |
| Correlation table for Study 1 (Supplemental Table 2)                       | p. 4  |
| Alternate analyses with concurrent GDP and Homicide (Supplemental Table 3) | p. 8  |
| Cross-checking data with alternate operationalization of violence          | p. 9  |
| Galton's Problem Analyses                                                  |       |
| Testing within world region and majority religion (Supplemental Table 5)   | p. 15 |
| Accounting for spatial autocorrelation                                     | p. 19 |
| Data Auditor Report                                                        | p. 20 |
| Testing Potential Mechanisms                                               | p. 23 |
| Pre-peer Review Methods and Results of Study 2                             | p. 25 |

## Source Information

Supplemental Table 1. *Source Information*

| Variable |                      | Study 1                                                                                                                                   | Study 2                                                                                                                                                                                           |
|----------|----------------------|-------------------------------------------------------------------------------------------------------------------------------------------|---------------------------------------------------------------------------------------------------------------------------------------------------------------------------------------------------|
| Religion | <b>Construct</b>     | % of the population that practices religion                                                                                               | % of the population that practices religion                                                                                                                                                       |
|          | <b>Source</b>        | ARDA (Maoz & Henderson, 2013)                                                                                                             | ARDA (Maoz & Henderson, 2013)                                                                                                                                                                     |
|          | <b>Available at:</b> | <a href="http://www.thearda.com/Archive/Files/Descriptions/WRPNATL.asp">http://www.thearda.com/Archive/Files/Descriptions/WRPNATL.asp</a> | <a href="http://www.thearda.com/Archive/Files/Descriptions/WRPNATL.asp">http://www.thearda.com/Archive/Files/Descriptions/WRPNATL.asp</a>                                                         |
|          | <b>Construct</b>     |                                                                                                                                           | % of the population affiliated with any religion                                                                                                                                                  |
|          | <b>Source</b>        |                                                                                                                                           | Pew, 2012                                                                                                                                                                                         |
|          | <b>Available at:</b> |                                                                                                                                           | <a href="http://www.pewforum.org/2012/12/18/table-religious-composition-by-country-in-percentages/">http://www.pewforum.org/2012/12/18/table-religious-composition-by-country-in-percentages/</a> |
|          | <b>Construct</b>     |                                                                                                                                           | % of the population that reports that religion is an                                                                                                                                              |
|          | <b>Source</b>        |                                                                                                                                           | Gallup, 2009                                                                                                                                                                                      |
|          | <b>Available at:</b> |                                                                                                                                           | <a href="https://news.gallup.com/poll/142727/Religiosity-Highest-World-Poorest-Nations.aspx#1">https://news.gallup.com/poll/142727/Religiosity-Highest-World-Poorest-Nations.aspx#1</a>           |
| IQ       | <b>Construct</b>     | Psychometric tests and school assessment studies,                                                                                         | Psychometric tests and school assessment studies,                                                                                                                                                 |
|          | <b>Source</b>        | THE NIQ-DATASET V1.3.2 (Becker, 2019)                                                                                                     | THE NIQ-DATASET V1.3.2 (Becker, 2019)                                                                                                                                                             |
|          | <b>Available at:</b> | <a href="http://viewoniq.org/?page_id=9">http://viewoniq.org/?page_id=9</a>                                                               | <a href="http://viewoniq.org/?page_id=9">http://viewoniq.org/?page_id=9</a>                                                                                                                       |
|          | <b>Construct</b>     | Psychometric tests only with geo replacement                                                                                              | Psychometric tests only with geo replacement                                                                                                                                                      |
|          | <b>Source</b>        | Lynn and Vanhanen (2012)                                                                                                                  | Lynn and Vanhanen (2012)                                                                                                                                                                          |
|          | <b>Available at:</b> | <a href="http://viewoniq.org/?page_id=9">http://viewoniq.org/?page_id=9</a>                                                               | <a href="http://viewoniq.org/?page_id=9">http://viewoniq.org/?page_id=9</a>                                                                                                                       |
|          | <b>Construct</b>     | Psychometric tests and school assessment studies                                                                                          | Psychometric tests and school assessment studies                                                                                                                                                  |
|          | <b>Source</b>        | Becker & Rindermann, 2016                                                                                                                 | Becker & Rindermann, 2016                                                                                                                                                                         |
|          | <b>Available at:</b> | <a href="http://viewoniq.org/?page_id=9">http://viewoniq.org/?page_id=9</a>                                                               | <a href="http://viewoniq.org/?page_id=9">http://viewoniq.org/?page_id=9</a>                                                                                                                       |
| Homicide | <b>Construct</b>     | Annual per capita homicide rates over time                                                                                                | Annual per capita homicide rates                                                                                                                                                                  |
|          | <b>Source</b>        | Clio Infra (Bierman & van Zanden, 2014)                                                                                                   | United Nations Office on Drugs and Crime, 2013                                                                                                                                                    |
|          | <b>Available at:</b> | <a href="https://clio-infra.eu/Indicators/HomicideRates.html#">https://clio-infra.eu/Indicators/HomicideRates.html#</a>                   | <a href="http://www.unodc.org/gsh/en/data.html">http://www.unodc.org/gsh/en/data.html</a>                                                                                                         |

|                           |                                                           |                                                                                                                                                                                                                                                                      |                                                                                                                                                                                                                                                               |
|---------------------------|-----------------------------------------------------------|----------------------------------------------------------------------------------------------------------------------------------------------------------------------------------------------------------------------------------------------------------------------|---------------------------------------------------------------------------------------------------------------------------------------------------------------------------------------------------------------------------------------------------------------|
| GDP                       | <b>Construct</b><br><b>Source</b><br><b>Available at:</b> | GDP per capita<br>The World Bank, 2017<br><a href="http://databank.worldbank.org/data/reports.aspx?source=2&amp;series=NY.GDP.PCAP.CD&amp;country=#">http://databank.worldbank.org/data/reports.aspx?source=2&amp;series=NY.GDP.PCAP.CD&amp;country=#</a>            | GDP per capita<br>The World Bank, 2017<br><a href="http://databank.worldbank.org/data/reports.aspx?source=2&amp;series=NY.GDP.PCAP.CD&amp;country=#">http://databank.worldbank.org/data/reports.aspx?source=2&amp;series=NY.GDP.PCAP.CD&amp;country=#</a>     |
| Income<br>Inequality      | <b>Construct</b><br><b>Source</b><br><b>Available at:</b> | Gini Index of income inequality<br>The World Bank, 2017<br><a href="http://databank.worldbank.org/data/reports.aspx?source=2&amp;series=SI.POV.GINI&amp;country=#">http://databank.worldbank.org/data/reports.aspx?source=2&amp;series=SI.POV.GINI&amp;country=#</a> | Gini Index of income inequality<br>Central Intelligence Agency, 2015<br><a href="https://www.cia.gov/library/publications/the-world-factbook/rankorder/2172rank.html">https://www.cia.gov/library/publications/the-world-factbook/rankorder/2172rank.html</a> |
| Population<br>Density     | <b>Construct</b><br><b>Source</b><br><b>Available at:</b> |                                                                                                                                                                                                                                                                      | Population density<br>The World Bank, 2015<br><a href="https://data.worldbank.org/indicator/EN.POP.DNST">https://data.worldbank.org/indicator/EN.POP.DNST</a>                                                                                                 |
| Educational<br>Attainment | <b>Construct</b><br><b>Source</b><br><b>Available at:</b> |                                                                                                                                                                                                                                                                      | Secondary education completion rate<br>The World Bank, 2019<br><a href="https://data.worldbank.org/indicator/SE.SEC.CMPT.LO.ZS">https://data.worldbank.org/indicator/SE.SEC.CMPT.LO.ZS</a>                                                                    |

---

Supplemental Table 2  
*Correlations Among Primary Study Variables by Measurement Year*

|                | Homicide (CY)<br><i>r (p)</i> | Homicide (5YA)<br><i>r (p)</i> | Religiosity<br><i>r (p)</i> | NIQ<br><i>r (p)</i>     | LV12GeoIQ<br><i>r (p)</i> | RIQ<br><i>r (p)</i> | GDP (CY)<br><i>r (p)</i> |
|----------------|-------------------------------|--------------------------------|-----------------------------|-------------------------|---------------------------|---------------------|--------------------------|
| <b>1945</b>    |                               |                                |                             |                         |                           |                     |                          |
| Homicide (5YA) | <b>0.963 (&lt;.001)</b>       | 1                              |                             |                         |                           |                     |                          |
| Religiosity    | 0.124 (.540)                  | 0.095 (.593)                   | 1                           |                         |                           |                     |                          |
| NIQ            | <b>-0.396 (.025)</b>          | -0.242 (.138)                  | -0.202 (.126)               | 1                       |                           |                     |                          |
| LV12GeoIQ      | <b>-0.381 (.032)</b>          | <b>-0.327 (.042)</b>           | <b>-0.289 (.023)</b>        | <b>0.802 (&lt;.001)</b> | 1                         |                     |                          |
| RIQ            | <b>-0.399 (.024)</b>          | <b>-0.361 (.024)</b>           | -0.221 (.084)               | <b>0.801 (&lt;.001)</b> | <b>0.982 (&lt;.001)</b>   | 1                   |                          |
| GDP (CY)       | NA                            | NA                             | NA                          | NA                      | NA                        | NA                  | NA                       |
| GDP (5YA)      | NA                            | NA                             | NA                          | NA                      | NA                        | NA                  | NA                       |
| <b>1950</b>    |                               |                                |                             |                         |                           |                     |                          |
| Homicide (5YA) | <b>0.981 (&lt;.001)</b>       | 1                              |                             |                         |                           |                     |                          |
| Religiosity    | 0.088 (.722)                  | 0.140 (.453)                   | 1                           |                         |                           |                     |                          |
| NIQ            | <b>-0.841 (&lt;.001)</b>      | <b>-0.590 (&lt;.001)</b>       | -0.227 (.062)               | 1                       |                           |                     |                          |
| LV12GeoIQ      | <b>-0.698 (&lt;.001)</b>      | <b>-0.533 (.001)</b>           | <b>-0.364 (.002)</b>        | <b>0.823 (&lt;.001)</b> | 1                         |                     |                          |
| RIQ            | <b>-0.676 (&lt;.001)</b>      | <b>-0.529 (.001)</b>           | <b>-0.284 (.015)</b>        | <b>0.819 (&lt;.001)</b> | <b>0.979 (&lt;.001)</b>   | 1                   |                          |
| GDP (CY)       | NA                            | NA                             | NA                          | NA                      | NA                        | NA                  | NA                       |
| GDP (5YA)      | NA                            | NA                             | NA                          | NA                      | NA                        | NA                  | NA                       |
| <b>1955</b>    |                               |                                |                             |                         |                           |                     |                          |
| Homicide (5YA) | <b>0.999 (&lt;.001)</b>       | 1                              |                             |                         |                           |                     |                          |
| Religiosity    | 0.254 (.161)                  | 0.240 (.178)                   | 1                           |                         |                           |                     |                          |
| NIQ            | <b>-0.544 (&lt;.001)</b>      | <b>-0.522 (&lt;.001)</b>       | -0.215 (.064)               | 1                       |                           |                     |                          |
| LV12GeoIQ      | <b>-0.497 (.002)</b>          | <b>-0.480 (.002)</b>           | <b>-0.345 (.002)</b>        | <b>0.813 (&lt;.001)</b> | 1                         |                     |                          |
| RIQ            | <b>-0.500 (.001)</b>          | <b>-0.468 (&lt;.001)</b>       | <b>-0.285 (.011)</b>        | <b>0.806 (&lt;.001)</b> | <b>0.976 (&lt;.001)</b>   | 1                   |                          |
| GDP (CY)       | NA                            | NA                             | NA                          | NA                      | NA                        | NA                  | NA                       |
| GDP (5YA)      | NA                            | NA                             | NA                          | NA                      | NA                        | NA                  | NA                       |
| <b>1960</b>    |                               |                                |                             |                         |                           |                     |                          |
| Homicide (5YA) | <b>0.993 (&lt;.001)</b>       | 1                              |                             |                         |                           |                     |                          |



|                |                          |                          |                          |                         |                         |                         |                         |
|----------------|--------------------------|--------------------------|--------------------------|-------------------------|-------------------------|-------------------------|-------------------------|
| Homicide (5YA) | <b>0.914 (&lt;.001)</b>  | 1                        |                          |                         |                         |                         |                         |
| Religiosity    | -0.014 (.920)            | -0.055 (.657)            | 1                        |                         |                         |                         |                         |
| NIQ            | <b>-0.483 (&lt;.001)</b> | <b>-0.359 (&lt;.001)</b> | <b>-0.329 (&lt;.001)</b> | 1                       |                         |                         |                         |
| LV12GeoIQ      | -0.179 (.179)            | -0.148 (.217)            | <b>-0.408 (&lt;.001)</b> | <b>0.855 (&lt;.001)</b> | 1                       |                         |                         |
| RIQ            | -0.156 (.242)            | -0.142 (.236)            | <b>-0.381 (&lt;.001)</b> | <b>0.857 (&lt;.001)</b> | <b>0.983 (&lt;.001)</b> | 1                       |                         |
| GDP (CY)       | -0.230 (.098)            | -0.245 (.051)            | -0.174 (.054)            | <b>0.429 (&lt;.001)</b> | <b>0.477 (&lt;.001)</b> | <b>0.507 (&lt;.001)</b> | 1                       |
| GDP (5YA)      | -0.222 (.110)            | -0.243 (.053)            | <b>-0.182 (.044)</b>     | <b>0.440 (&lt;.001)</b> | <b>0.486 (&lt;.001)</b> | <b>0.516 (&lt;.001)</b> | <b>0.989 (&lt;.001)</b> |
| <i>1985</i>    |                          |                          |                          |                         |                         |                         |                         |
| Homicide (5YA) | <b>0.963 (&lt;.001)</b>  | 1                        |                          |                         |                         |                         |                         |
| Religiosity    | 0.074 (.589)             | 0.062 (.6288)            | 1                        |                         |                         |                         |                         |
| NIQ            | <b>-0.323 (.008)</b>     | <b>-0.498 (&lt;.001)</b> | <b>-0.369 (&lt;.001)</b> | 1                       |                         |                         |                         |
| LV12GeoIQ      | <b>-0.240 (.042)</b>     | <b>-0.230 (.042)</b>     | <b>-0.439 (&lt;.001)</b> | <b>0.849 (&lt;.001)</b> | 1                       |                         |                         |
| RIQ            | <b>-0.255 (.031)</b>     | -0.202 (.075)            | <b>-0.419 (&lt;.001)</b> | <b>0.859 (&lt;.001)</b> | <b>0.982 (&lt;.001)</b> | 1                       |                         |
| GDP (CY)       | <b>-0.283 (.049)</b>     | <b>-0.275 (.041)</b>     | -0.089 (.310)            | <b>0.537 (&lt;.001)</b> | <b>0.559 (&lt;.001)</b> | <b>0.594 (&lt;.001)</b> | 1                       |
| GDP (5YA)      | <b>-0.305 (.033)</b>     | <b>-0.287 (.032)</b>     | -0.070 (.419)            | <b>0.478 (&lt;.001)</b> | <b>0.509 (&lt;.001)</b> | <b>0.5449</b>           | <b>0.986 (&lt;.001)</b> |
| <i>1990</i>    |                          |                          |                          |                         |                         |                         |                         |
| Homicide (5YA) | <b>0.982 (&lt;.001)</b>  | 1                        |                          |                         |                         |                         |                         |
| Religiosity    | 0.073 (.575)             | 0.110 (.362)             | 1                        |                         |                         |                         |                         |
| NIQ            | <b>-0.287 (.015)</b>     | <b>-0.302 (.006)</b>     | <b>-0.376 (&lt;.001)</b> | 1                       |                         |                         |                         |
| LV12GeoIQ      | <b>-0.301 (.007)</b>     | <b>-0.260 (.014)</b>     | <b>-0.434 (&lt;.001)</b> | <b>0.853 (&lt;.001)</b> | 1                       |                         |                         |
| RIQ            | <b>-0.291 (.009)</b>     | <b>-0.253 (.017)</b>     | <b>-0.414 (&lt;.001)</b> | <b>0.867 (&lt;.001)</b> | <b>0.981 (&lt;.001)</b> | 1                       |                         |
| GDP (CY)       | <b>-0.303 (.012)</b>     | <b>-0.287 (.012)</b>     | -0.144 (.086)            | <b>0.583 (&lt;.001)</b> | <b>0.588 (&lt;.001)</b> | <b>0.616 (&lt;.001)</b> | 1                       |
| GDP (5YA)      | <b>-0.298 (.014)</b>     | <b>-0.283 (.013)</b>     | -0.144 (.084)            | <b>0.578 (&lt;.001)</b> | <b>0.589 (&lt;.001)</b> | <b>0.616 (&lt;.001)</b> | <b>0.995 (&lt;.001)</b> |
| <i>1995</i>    |                          |                          |                          |                         |                         |                         |                         |
| Homicide (5YA) | <b>0.950 (&lt;.001)</b>  | 1                        |                          |                         |                         |                         |                         |
| Religiosity    | -0.075 (.476)            | -0.042 (.688)            | 1                        |                         |                         |                         |                         |
| NIQ            | <b>-0.410 (&lt;.001)</b> | <b>-0.351 (.001)</b>     | <b>-0.416 (&lt;.001)</b> | 1                       |                         |                         |                         |
| LV12GeoIQ      | <b>-0.419 (&lt;.001)</b> | <b>-0.381 (&lt;.001)</b> | <b>-0.459 (&lt;.001)</b> | <b>0.852 (&lt;.001)</b> | 1                       |                         |                         |
| RIQ            | <b>-0.404 (&lt;.001)</b> | <b>-0.360 (&lt;.001)</b> | <b>-0.454 (&lt;.001)</b> | <b>0.867 (&lt;.001)</b> | <b>0.979 (&lt;.001)</b> | 1                       |                         |
| GDP (CY)       | <b>-0.362 (&lt;.001)</b> | <b>-0.334 (.002)</b>     | -0.112 (.148)            | <b>0.548 (&lt;.001)</b> | <b>0.575 (&lt;.001)</b> | <b>0.594 (&lt;.001)</b> | 1                       |

|                |                          |                          |                          |                         |                         |                         |                         |
|----------------|--------------------------|--------------------------|--------------------------|-------------------------|-------------------------|-------------------------|-------------------------|
| GDP (5YA)      | <b>-0.360 (&lt;.001)</b> | <b>-0.333 (.002)</b>     | -0.112 (.146)            | <b>0.549 (&lt;.001)</b> | <b>0.574 (&lt;.001)</b> | <b>0.595 (&lt;.001)</b> | <b>0.996 (&lt;.001)</b> |
| <b>2000</b>    |                          |                          |                          |                         |                         |                         |                         |
| Homicide (5YA) | <b>0.967 (&lt;.001)</b>  | 1                        |                          |                         |                         |                         |                         |
| Religiosity    | 0.023 (.815)             | 0.005 (.962)             | 1                        |                         |                         |                         |                         |
| NIQ            | <b>-0.367 (&lt;.001)</b> | <b>-0.377 (&lt;.001)</b> | <b>-0.466 (&lt;.001)</b> | 1                       |                         |                         |                         |
| LV12GeoIQ      | <b>-0.360 (&lt;.001)</b> | <b>-0.385 (&lt;.001)</b> | <b>-0.496 (&lt;.001)</b> | <b>0.852 (&lt;.001)</b> | 1                       |                         |                         |
| RIQ            | <b>-0.354 (&lt;.001)</b> | <b>-0.371 (&lt;.001)</b> | <b>-0.494 (&lt;.001)</b> | <b>0.868 (&lt;.001)</b> | <b>0.979 (&lt;.001)</b> | 1                       |                         |
| GDP (CY)       | <b>-0.300 (.002)</b>     | <b>-0.331 (.001)</b>     | <b>-0.206 (.007)</b>     | <b>0.533 (&lt;.001)</b> | <b>0.553 (&lt;.001)</b> | <b>0.576 (&lt;.001)</b> | 1                       |
| GDP (5YA)      | <b>-0.305 (.002)</b>     | <b>-0.335 (&lt;.001)</b> | <b>-0.223 (.003)</b>     | <b>0.549 (&lt;.001)</b> | <b>0.572 (&lt;.001)</b> | <b>0.594 (&lt;.001)</b> | <b>0.994 (&lt;.001)</b> |
| <b>2005</b>    |                          |                          |                          |                         |                         |                         |                         |
| Homicide (5YA) | <b>0.951 (&lt;.001)</b>  | 1                        |                          |                         |                         |                         |                         |
| Religiosity    | -0.002 (.981)            | 0.102 (.182)             | 1                        |                         |                         |                         |                         |
| NIQ            | <b>-0.403 (&lt;.001)</b> | <b>-0.458 (&lt;.001)</b> | <b>-0.464 (&lt;.001)</b> | 1                       |                         |                         |                         |
| LV12GeoIQ      | <b>-0.379 (&lt;.001)</b> | <b>-0.541 (&lt;.001)</b> | <b>-0.511 (&lt;.001)</b> | <b>0.852 (&lt;.001)</b> | 1                       |                         |                         |
| RIQ            | <b>-0.371 (&lt;.001)</b> | <b>-0.537 (&lt;.001)</b> | <b>-0.508 (&lt;.001)</b> | <b>0.868 (&lt;.001)</b> | <b>0.979 (&lt;.001)</b> | 1                       |                         |
| GDP (CY)       | <b>-0.302 (.001)</b>     | <b>-0.382 (&lt;.001)</b> | <b>-0.229 (.002)</b>     | <b>0.538 (&lt;.001)</b> | <b>0.559 (&lt;.001)</b> | <b>0.585 (&lt;.001)</b> | 1                       |
| GDP (5YA)      | <b>-0.300 (.001)</b>     | <b>-0.383 (&lt;.001)</b> | <b>-0.230 (.002)</b>     | <b>0.542 (&lt;.001)</b> | <b>0.564 (&lt;.001)</b> | <b>0.589 (&lt;.001)</b> | <b>0.996 (&lt;.001)</b> |
| <b>2010</b>    |                          |                          |                          |                         |                         |                         |                         |
| Homicide (5YA) | <b>0.97 (&lt;.001)</b>   | 1                        |                          |                         |                         |                         |                         |
| Religiosity    | 0.154 (.176)             | 0.116 (.132)             | 1                        |                         |                         |                         |                         |
| NIQ            | <b>-0.583 (&lt;.001)</b> | <b>-0.451 (&lt;.001)</b> | <b>-0.475 (&lt;.001)</b> | 1                       |                         |                         |                         |
| LV12GeoIQ      | <b>-0.574 (&lt;.001)</b> | <b>-0.502 (&lt;.001)</b> | <b>-0.54 (&lt;.001)</b>  | <b>0.852 (&lt;.001)</b> | 1                       |                         |                         |
| RIQ            | <b>-0.567 (&lt;.001)</b> | <b>-0.493 (&lt;.001)</b> | <b>-0.53 (&lt;.001)</b>  | <b>0.868 (&lt;.001)</b> | <b>0.979 (&lt;.001)</b> | 1                       |                         |
| GDP (CY)       | <b>-0.329 (.005)</b>     | <b>-0.341 (&lt;.001)</b> | <b>-0.298 (&lt;.001)</b> | <b>0.557 (&lt;.001)</b> | <b>0.579 (&lt;.001)</b> | <b>0.605 (&lt;.001)</b> | 1                       |
| GDP (5YA)      | <b>-0.323 (.005)</b>     | <b>-0.339 (&lt;.001)</b> | <b>-0.293 (&lt;.001)</b> | <b>0.551 (&lt;.001)</b> | <b>0.572 (&lt;.001)</b> | <b>0.598 (&lt;.001)</b> | <b>0.995 (&lt;.001)</b> |

Notes. (CY) means current year; (5YA) means five year average. NA means data not available. Correlations with  $ps < .05$  displayed in bold typeface.

Supplemental Table 3

*Within-Country Associations between Religiosity and Homicide Rates by Average Country IQ With Concurrent GDP and Homicide (Rather Than Five Year Averages)*

|                      | Coef  | 95% CI |       | SE   | <i>p</i> |
|----------------------|-------|--------|-------|------|----------|
| <u>Model 1</u>       |       |        |       |      |          |
| Religion             | 0.01  | -0.07  | 0.09  | 0.04 | .720     |
| <u>Model 2a</u>      |       |        |       |      |          |
| Religion             | -3.48 | -5.80  | -1.17 | 1.17 | .004     |
| Religion X NIQ       | 0.04  | 0.01   | 0.06  | 0.01 | .003     |
| <u>Model 2b</u>      |       |        |       |      |          |
| Religion             | -3.69 | -5.92  | -1.46 | 1.13 | .001     |
| Religion X LV12GEOIQ | 0.04  | 0.02   | 0.06  | 0.01 | .001     |
| <u>Model 2c</u>      |       |        |       |      |          |
| Religion             | -3.16 | -5.20  | -1.13 | 1.03 | .003     |
| Religion X RIQ       | 0.03  | 0.01   | 0.05  | 0.01 | .002     |
| <u>Model 3</u>       |       |        |       |      |          |
| Religion             | -0.09 | -0.20  | 0.01  | 0.05 | .079     |
| GDP                  | -0.05 | -0.08  | -0.02 | 0.02 | .003     |
| <u>Model 4a</u>      |       |        |       |      |          |
| Religion             | -2.89 | -5.32  | -0.47 | 1.22 | .020     |
| Religion X NIQ       | 0.03  | 0.00   | 0.06  | 0.01 | .021     |
| GDP                  | -0.03 | -0.06  | 0.00  | 0.02 | .082     |
| <u>Model 4b</u>      |       |        |       |      |          |
| Religion             | -3.07 | -5.18  | -0.96 | 1.07 | .005     |
| Religion X LV12GEOIQ | 0.03  | 0.01   | 0.05  | 0.01 | .005     |
| GDP                  | -0.03 | -0.06  | 0.00  | 0.02 | .036     |
| <u>Model 4c</u>      |       |        |       |      |          |
| Religion             | -2.51 | -4.40  | -0.62 | 0.96 | .010     |
| Religion X RIQ       | 0.03  | 0.01   | 0.05  | 0.01 | .010     |
| GDP                  | -0.03 | -0.06  | 0.00  | 0.02 | .032     |

*Notes.* Fixed effects linear regressions with robust standard errors used for all models. Homicide and GDP variables were temporally concurrent with the year in which the religiosity data were reported. All models also controlled for historical changes by including a series of dummy-coded time variables representing each of the measurement years (less one).

### **Cross-checking data with alternate operationalization of violence**

Regrettably, there are few reliable cross-national measures of violence. For our main analysis, we selected homicide rates because homicide is defined, detected, and recorded more similarly across nations than other types of crimes (Neopolitan, 1996). However, we were very interested in cross-checking our interaction with an additional measure of violence for two reasons. First, we expect that our interaction likely exists for violence more broadly (not only homicide) and perhaps even other types of non-violent crimes (though we expect at minimum it would vary by type of non-violent crime). Second, as noted by a reviewer and our editor, homicides are a relatively rare form of violence, and so it would be more compelling if there were some evidence of the interaction when analyzing violence more broadly.

It occurred to us that the tourism industry would be interested in compiling a reasonably reliable dataset on the violence of different countries for purposes of advising citizens about which countries can be traveled to safely. We discovered the World Economic Forum's (2017) Executive Opinion Survey, which contains three questions regarding citizens' perceived safety and security of their own country (the extent to which crime and violence impose costs to businesses, the extent to which police can be relied upon, and the extent to which the threat of terrorism imposes costs to businesses). These three items are combined unweighted with the Index of Terrorism Incidence and Homicide Rates (which overlaps with our main dependent variable in the main text, but only contributes 20% of the total safety score) to create a Tourism Safety Score (higher tourism safety indicating lower perceived violence). Full data and description of the methods can be found here: <http://reports.weforum.org/travel-and-tourism-competitiveness-report-2017/downloads/>.

Admittedly, these data are not ideal. First, they are based largely on perceptions of crime and violence rather than actual incidence, which are subjective and likely influenced by the relative safety of surrounding countries. Second, the report contains data for 141 countries only, which limits our sample size further and raises concerns about the randomness of missing countries (likely, countries that have little tourism). Limitations aside, if these data demonstrate a similar pattern as our main multiverse, this would provide even more compelling support for our proposed interaction.

**Correlations.** As can be seen in Supplemental Table 4, higher tourism safety was negatively correlated with homicide rates, all three religiosity measures, and income inequality, positively correlated with all three IQ measures, GDP, and educational attainment, and unrelated to population density.

Supplemental Table 4.

*Correlations between homicide rates and tourism safety and all other variables.*

|                  |          | Homicide<br>Rate | Tourism<br>Safety |
|------------------|----------|------------------|-------------------|
| Homicide Rate    | <i>r</i> | 1                | -0.569            |
|                  | <i>p</i> | --               | <.001             |
| NIQ              | <i>r</i> | -0.421           | 0.515             |
|                  | <i>p</i> | <.001            | <.001             |
| LV12GeoIQ        | <i>r</i> | -0.378           | 0.486             |
|                  | <i>p</i> | <.001            | <.001             |
| RIQ (4)          | <i>r</i> | -0.375           | 0.501             |
|                  | <i>p</i> | <.001            | <.001             |
| ARDA Religiosity | <i>r</i> | 0.082            | -0.298            |
|                  | <i>p</i> | 0.259            | <.001             |
| Pew Religiosity  | <i>r</i> | 0.101            | -0.306            |
|                  | <i>p</i> | 0.135            | <.001             |

|                        |          |        |        |
|------------------------|----------|--------|--------|
| Gallup Religiosity     | <i>r</i> | 0.244  | -0.498 |
|                        | <i>p</i> | 0.003  | <.001  |
| GDP                    | <i>r</i> | -0.240 | 0.578  |
|                        | <i>p</i> | <.001  | <.001  |
| Gini                   | <i>r</i> | 0.509  | -0.399 |
|                        | <i>p</i> | <.001  | <.001  |
| Population Density     | <i>r</i> | -0.102 | 0.153  |
|                        | <i>p</i> | 0.144  | 0.070  |
| Educational Attainment | <i>r</i> | -0.248 | 0.399  |
|                        | <i>p</i> | 0.001  | <.001  |

Shaded indicates significant negative correlation; outlined indicates significant positive correlation; unaccented indicates no significant relationship.

**IQ x Religiosity Interaction.** We conducted a 144 model multiverse regressing one of the three operationalizations of religiosity, one of the three operationalizations of IQ, and the relevant interaction (for nine possible interaction terms), first independently and then with every combination of the same four control variables from the main analyses on tourism safety scores ( $ns = 91$ -141 countries). The interaction effect was smaller, but very similar to the interaction in our main multiverse. The effect sizes for the interaction between religiosity and IQ ranged from very small, semipartial  $r = -.034$ , to small/medium, semipartial  $r = -.206$ , with a small/medium average effect size ( $M$  semipartial  $r = -.137$ ,  $SD = .04$ ). The interaction was statistically significant at  $p < .050$  in 33.3% of the models, marginal ( $p < .100$ ) in 60.4% of the models, and  $p < .675$  in 100% of the models. See Supplemental Figure 1.

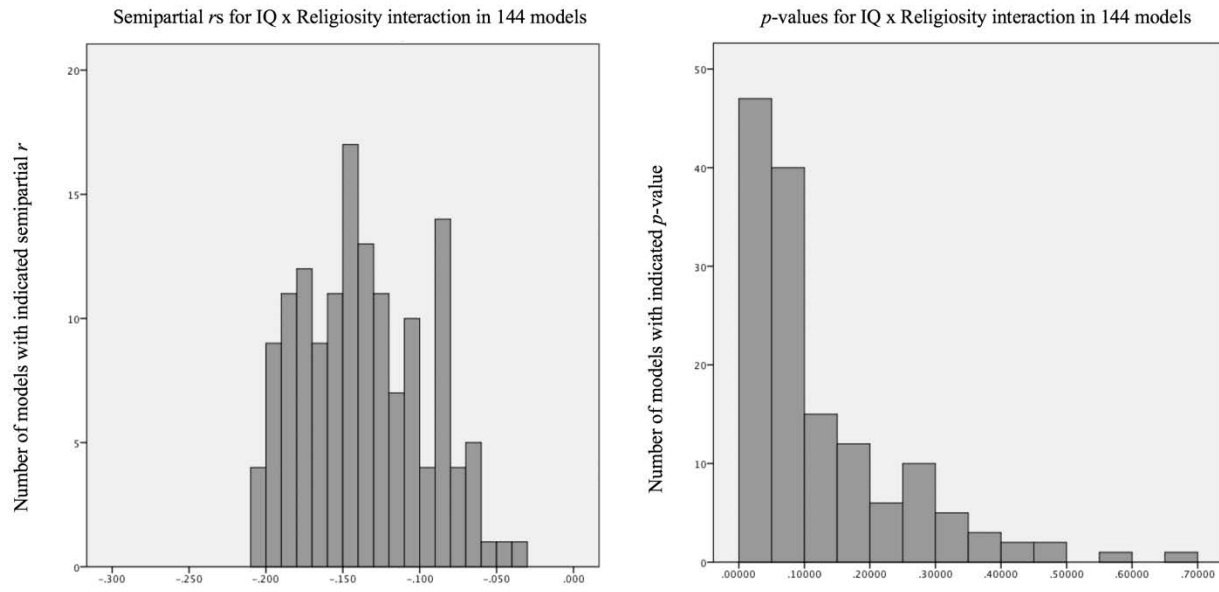

*Supplemental Figure 1.* Multiverse analysis frequency histograms of semipartial  $r$ s and  $p$ -values for the interactions between IQ and religiosity.

**Sample model.** We selected the model closest to the mean model with all four control variables to expand upon and for purposes of graphing the interaction (NIQ x Pew; See Supplemental Table 5). Note that given the limited sample size, the interaction does not reach statistical significance ( $p = .117$ ), but the effect size was above the threshold for a small effect (semipartial  $r = -.133$ ). Neither simple slopes one standard deviation above and below the mean are statistically significant, but Supplemental Figure 2 displays a clear pattern of results consistent with the homicide multiverse: In countries with relatively high average IQ, there was virtually no relationship (or a very slightly negative one) between higher religiosity and tourism safety scores (NIQ x Pew [ $b = -.04$ ],  $t = -0.41$ ,  $p = .683$ ), but in countries with lower average IQ, higher religiosity was associated (non-significantly) with higher safety scores (NIQ x Pew [ $b = .38$ ],  $t = 1.39$ ,  $p = .169$ ).

Supplemental Table 5.

*Tourism safety scores regressed on IQ, religiosity, their interaction, and controls.*

|                                               | <i>F</i> | <i>R</i> <sup>2</sup> | $\beta$      | <i>t</i>     | <i>p</i>     | 95% CI           | Semipartial<br><i>r</i> |
|-----------------------------------------------|----------|-----------------------|--------------|--------------|--------------|------------------|-------------------------|
| <b>Sample model for NIQ x Pew religiosity</b> |          |                       |              |              |              |                  |                         |
| Model ( <i>n</i> = 97)                        | 7.58     | 0.37                  |              |              | <.001        |                  |                         |
| IQ (NIQ)                                      |          |                       | 0.25         | 1.64         | 0.104        | -.05, .57        | 0.138                   |
| Religiosity (Pew)                             |          |                       | 0.22         | 1.14         | 0.259        | -.14, .51        | 0.095                   |
| <b>IQ x Religiosity</b>                       |          |                       | <b>-0.28</b> | <b>-1.58</b> | <b>0.117</b> | <b>-.47, .05</b> | <b>-0.133</b>           |
| GDP                                           |          |                       | 0.27         | 1.77         | 0.080        | -.08, 1.32       | 0.148                   |
| Income<br>Inequality                          |          |                       | -0.18        | -1.71        | 0.090        | -.39, .03        | -0.144                  |
| Population<br>Density                         |          |                       | 0.05         | 0.51         | 0.610        | -.27, .46        | 0.043                   |
| Education                                     |          |                       | 0.05         | 0.37         | 0.710        | -.26, .38        | 0.031                   |

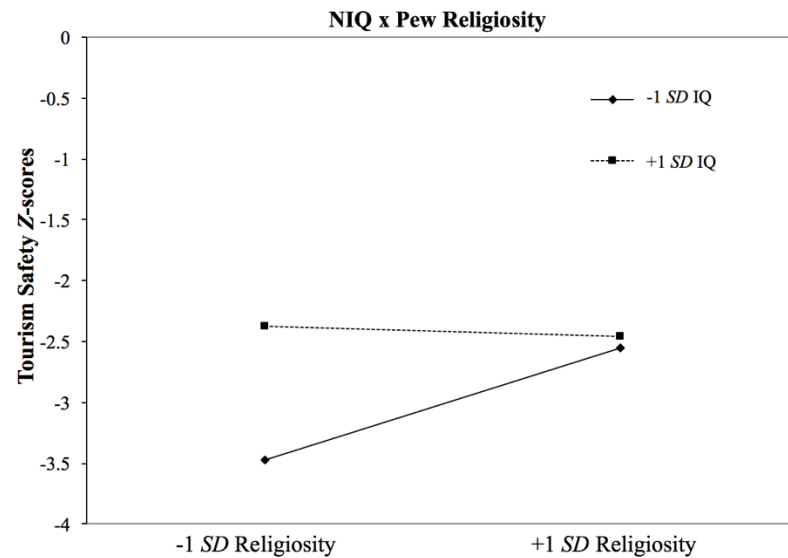*Supplemental Figure 2. Interaction between NIQ x Pew religiosity on (higher) tourism safety with all four controls.*

## Discussion

The interaction between IQ and religiosity on tourism safety demonstrated a very similar (though weaker) pattern as the interaction between IQ and religiosity on homicide rates. Despite that the interaction was only statistically significant in 22.2% of tested models and marginal in

50% of tested models, it was similar across all models and always in the range of a very small to small/medium effect, with a small/medium average effect. Thus, these results increase our confidence that our hypothesized (and highly supported) interaction between country-level IQ and religiosity on violence is real and meaningful. Indeed, we have scrutinized this interaction in nearly every single way we could conceive of, and it remains robust.

However, given that these data are quite limited and the effect is relatively small, we consider these data confirmatory support for the interaction reported in the main text only, and we do not consider these conclusive support for tourism safety specifically. We have not exposed these analyses to the same level of scrutiny as we did the interaction reported in the main text. In other words, we would not interpret this interaction as indicating that countries relatively low in both IQ and religiosity would be generally unsafe to travel to. Rather, we are quite confident now that such countries have relatively high homicide rates and (possibly) more violence in general.

### Galton's Problem Analyses

Please see the subheading Galton's Problem and Spatial Autocorrelation in the main text for a description of what these analyses are and why they were performed.

Supplemental Table 5.

*Testing within world region and within majority religion*

| <b>Controlling for Region</b>  | <b>Controls</b> | <b>semipartial <math>r</math></b> | <b><math>p</math></b> | <b><math>n</math></b> |
|--------------------------------|-----------------|-----------------------------------|-----------------------|-----------------------|
| NIQxARDA                       | 9: All          | 0.234                             | 0.001                 | 101                   |
| NIQxPew                        | 9: All          | 0.258                             | <.001                 | 103                   |
| NIQxGallup                     | 9: All          | 0.092                             | 0.214                 | 97                    |
| LV12xARDA                      | 9: All          | 0.190                             | 0.005                 | 119                   |
| LV12xPew                       | 9: All          | 0.209                             | 0.002                 | 122                   |
| LV12xGallup                    | 9: All          | 0.081                             | 0.259                 | 111                   |
| RIQxARDA                       | 9: All          | 0.197                             | 0.004                 | 119                   |
| RIQxPew                        | 9: All          | 0.236                             | <.001                 | 122                   |
| RIQxGallup                     | 9: All          | 0.099                             | 0.172                 | 111                   |
| <b>Within Regions</b>          |                 |                                   |                       |                       |
| <b>Europe and Central Asia</b> | <b>Controls</b> | <b>semipartial <math>r</math></b> | <b><math>p</math></b> | <b><math>n</math></b> |
| NIQxARDA                       | None            | -0.038                            | 0.778                 | 48                    |
| NIQxPew                        | None            | -0.165                            | 0.232                 | 48                    |
| NIQxGallup                     | None            | -0.097                            | 0.501                 | 45                    |
| LV12xARDA                      | None            | 0.178                             | 0.260                 | 50                    |
| LV12xPew                       | None            | 0.071                             | 0.589                 | 51                    |
| LV12xGallup                    | None            | 0.018                             | 0.895                 | 45                    |
| RIQxARDA                       | None            | 0.137                             | 0.247                 | 50                    |
| RIQxPew                        | None            | 0.090                             | 0.474                 | 51                    |
| RIQxGallup                     | None            | 0.006                             | 0.964                 | 45                    |
| NIQxARDA                       | 1: Gini         | 0.122                             | 0.554                 | 21                    |
| NIQxPew                        | 1: Gini         | 0.148                             | 0.487                 | 21                    |
| NIQxGallup                     | 1: Gini         | 0.099                             | 0.641                 | 21                    |
| LV12xARDA                      | 1: Gini         | 0.038                             | 0.860                 | 23                    |
| LV12xPew                       | 1: Gini         | 0.036                             | 0.865                 | 23                    |
| LV12xGallup                    | 1: Gini         | -0.007                            | 0.973                 | 22                    |
| RIQxARDA                       | 1: Gini         | 0.097                             | 0.661                 | 23                    |
| RIQxPew                        | 1: Gini         | 0.079                             | 0.718                 | 23                    |
| RIQxGallup                     | 1: Gini         | 0.027                             | 0.904                 | 22                    |
| <b>Middle East and Africa</b>  | <b>Controls</b> | <b>semipartial <math>r</math></b> | <b><math>p</math></b> | <b><math>n</math></b> |
| NIQxARDA                       | None            | -0.056                            | 0.693                 | 44                    |
| NIQxPew                        | None            | 0.038                             | 0.763                 | 45                    |

|                                              |                 |                                   |                       |                       |
|----------------------------------------------|-----------------|-----------------------------------|-----------------------|-----------------------|
| NIQxGallup                                   | None            | 0.396                             | 0.012                 | 36                    |
| LV12xARDA                                    | None            | 0.017                             | 0.882                 | 66                    |
| LV12xPew                                     | None            | -0.187                            | 0.078                 | 67                    |
| LV12xGallup                                  | None            | 0.255                             | 0.047                 | 52                    |
| RIQxARDA                                     | None            | 0.012                             | 0.917                 | 66                    |
| RIQxPew                                      | None            | -0.127                            | 0.241                 | 67                    |
| RIQxGallup                                   | None            | 0.265                             | 0.044                 | 52                    |
| NIQxARDA                                     | 1: Gini         | 0.335                             | 0.062                 | 28                    |
| NIQxPew                                      | 1: Gini         | 0.143                             | 0.368                 | 28                    |
| NIQxGallup                                   | 1: Gini         | 0.141                             | 0.398                 | 25                    |
| LV12xARDA                                    | 1: Gini         | 0.457                             | 0.001                 | 42                    |
| LV12xPew                                     | 1: Gini         | 0.322                             | 0.013                 | 43                    |
| LV12xGallup                                  | 1: Gini         | 0.258                             | 0.056                 | 38                    |
| RIQxARDA                                     | 1: Gini         | 0.489                             | 0.001                 | 42                    |
| RIQxPew                                      | 1: Gini         | 0.342                             | 0.009                 | 43                    |
| RIQxGallup                                   | 1: Gini         | 0.260                             | 0.056                 | 38                    |
| <hr/>                                        |                 |                                   |                       |                       |
| <b>South Asia and East Asia Pacific</b>      | <b>Controls</b> | <b>semipartial <math>r</math></b> | <b><math>p</math></b> | <b><math>n</math></b> |
| NIQxARDA                                     | None            | 0.493                             | 0.033                 | 20                    |
| NIQxPew                                      | None            | 0.386                             | 0.064                 | 23                    |
| NIQxGallup                                   | None            | 0.211                             | 0.350                 | 19                    |
| LV12xARDA                                    | None            | 0.033                             | 0.850                 | 34                    |
| LV12xPew                                     | None            | 0.044                             | 0.780                 | 39                    |
| LV12xGallup                                  | None            | 0.024                             | 0.910                 | 21                    |
| RIQxARDA                                     | None            | 0.156                             | 0.363                 | 34                    |
| RIQxPew                                      | None            | 0.165                             | 0.286                 | 39                    |
| RIQxGallup                                   | None            | -0.048                            | 0.822                 | 21                    |
| NIQxARDA                                     | 1: Gini         | -0.047                            | 0.846                 | 18                    |
| NIQxPew                                      | 1: Gini         | -0.059                            | 0.792                 | 20                    |
| NIQxGallup                                   | 1: Gini         | 0.450                             | 0.178                 | 18                    |
| LV12xARDA                                    | 1: Gini         | 0.163                             | 0.492                 | 22                    |
| LV12xPew                                     | 1: Gini         | 0.082                             | 0.704                 | 24                    |
| LV12xGallup                                  | 1: Gini         | -0.131                            | 0.591                 | 18                    |
| RIQxARDA                                     | 1: Gini         | 0.181                             | 0.401                 | 22                    |
| RIQxPew                                      | 1: Gini         | 0.110                             | 0.583                 | 24                    |
| RIQxGallup                                   | 1: Gini         | -0.118                            | 0.626                 | 18                    |
| <hr/>                                        |                 |                                   |                       |                       |
| <b>North and Latin America and Caribbean</b> | <b>Controls</b> | <b>semipartial <math>r</math></b> | <b><math>p</math></b> | <b><math>n</math></b> |
| NIQxARDA                                     | None            | 0.288                             | 0.093                 | 28                    |
| NIQxPew                                      | None            | 0.175                             | 0.292                 | 30                    |
| NIQxGallup                                   | None            | 0.134                             | 0.458                 | 25                    |

|             |         |        |       |    |
|-------------|---------|--------|-------|----|
| LV12xARDA   | None    | 0.194  | 0.256 | 35 |
| LV12xPew    | None    | 0.257  | 0.115 | 37 |
| LV12xGallup | None    | -0.052 | 0.782 | 26 |
| RIQxARDA    | None    | 0.209  | 0.224 | 35 |
| RIQxPew     | None    | 0.258  | 0.117 | 37 |
| RIQxGallup  | None    | 0.010  | 0.960 | 26 |
| NIQxARDA    | 1: Gini | 0.122  | 0.554 | 21 |
| NIQxPew     | 1: Gini | 0.148  | 0.487 | 21 |
| NIQxGallup  | 1: Gini | 0.099  | 0.641 | 21 |
| LV12xARDA   | 1: Gini | 0.038  | 0.860 | 23 |
| LV12xPew    | 1: Gini | 0.036  | 0.865 | 23 |
| LV12xGallup | 1: Gini | -0.007 | 0.973 | 22 |
| RIQxARDA    | 1: Gini | 0.097  | 0.661 | 23 |
| RIQxPew     | 1: Gini | 0.079  | 0.718 | 23 |
| RIQxGallup  | 1: Gini | 0.027  | 0.904 | 22 |

**Within Religions**

| <b>Christian Majority</b> | <b>Controls</b> | <b>semipartial <i>r</i></b> | <b><i>p</i></b> | <b><i>n</i></b> |
|---------------------------|-----------------|-----------------------------|-----------------|-----------------|
| NIQxARDA                  | None            | 0.269                       | 0.001           | 88              |
| NIQxPew                   | None            | 0.193                       | 0.024           | 91              |
| NIQxGallup                | None            | 0.152                       | 0.101           | 78              |
| LV12xARDA                 | None            | 0.308                       | <.001           | 118             |
| LV12xPew                  | None            | 0.197                       | 0.015           | 124             |
| LV12xGallup               | None            | 0.262                       | 0.007           | 87              |
| RIQxARDA                  | None            | 0.297                       | <.001           | 118             |
| RIQxPew                   | None            | 0.211                       | 0.009           | 124             |
| RIQxGallup                | None            | 0.281                       | 0.004           | 87              |
| NIQxARDA                  | 1: Gini         | 0.238                       | 0.007           | 74              |
| NIQxPew                   | 1: Gini         | 0.124                       | 0.173           | 74              |
| NIQxGallup                | 1: Gini         | 0.057                       | 0.546           | 71              |
| LV12xARDA                 | 1: Gini         | 0.236                       | 0.007           | 87              |
| LV12xPew                  | 1: Gini         | 0.174                       | 0.049           | 87              |
| LV12xGallup               | 1: Gini         | 0.139                       | 0.149           | 79              |
| RIQxARDA                  | 1: Gini         | 0.224                       | 0.010           | 87              |
| RIQxPew                   | 1: Gini         | 0.191                       | 0.030           | 87              |
| RIQxGallup                | 1: Gini         | 0.149                       | 0.123           | 79              |
| <b>Muslim Majority</b>    | <b>Controls</b> | <b>semipartial <i>r</i></b> | <b><i>p</i></b> | <b><i>n</i></b> |
| NIQxARDA                  | None            | -0.188                      | 0.248           | 35              |
| NIQxPew                   | None            | -0.055                      | 0.745           | 35              |
| NIQxGallup                | None            | 0.021                       | 0.907           | 31              |
| LV12xARDA                 | None            | -0.071                      | 0.590           | 45              |

|             |         |        |       |    |
|-------------|---------|--------|-------|----|
| LV12xPew    | None    | 0      | 0.998 | 45 |
| LV12xGallup | None    | 0.041  | 0.786 | 38 |
| RIQxARDA    | None    | -0.069 | 0.606 | 45 |
| RIQxPew     | None    | -0.01  | 0.943 | 45 |
| RIQxGallup  | None    | 0.074  | 0.616 | 38 |
| NIQxARDA    | 1: Gini | -0.136 | 0.470 | 24 |
| NIQxPew     | 1: Gini | -0.117 | 0.538 | 24 |
| NIQxGallup  | 1: Gini | 0.053  | 0.785 | 23 |
| LV12xARDA   | 1: Gini | -0.02  | 0.906 | 31 |
| LV12xPew    | 1: Gini | -0.036 | 0.831 | 31 |
| LV12xGallup | 1: Gini | 0.071  | 0.670 | 28 |
| RIQxARDA    | 1: Gini | -0.023 | 0.894 | 31 |
| RIQxPew     | 1: Gini | -0.033 | 0.844 | 31 |
| RIQxGallup  | 1: Gini | 0.114  | 0.480 | 28 |

---

### **Controlling for Spatial Autocorrelation in *Declines in Religiosity Predict Increases in Violent Crime Among Low IQ Countries Only***

By Scott Claessens

I ran Bayesian multilevel regressions including a Gaussian process to account for spatial autocorrelation between countries. I fitted 18 models in total: all 9 main models with each possible combination of IQ and Religion measures (3 IQ measures x 3 Religiosity measures) and again including all four controls (GDP square root, GINI coefficient, population density, and education). For these models, I calculated pMCMC values (proportion of posterior samples for the interaction parameter below zero), effect sizes as semi-partial  $r$ s (square root of Bayesian  $R$  square change from adding interaction parameter), and changes in Leave-One-Out Cross-Validation (LOO) from adding the interaction parameter.

The interaction parameter was statistically significant at  $pMCMC < .001$  in 1/18 (5.55%) of these models,  $pMCMC < .010$  in 6/18 (33.33%) of models,  $pMCMC < .050$  in 8/18 (44.44%) of models,  $pMCMC < .100$  in 13/18 (72.22%) of models, and  $pMCMC < .228$  in 18/18 (100%) of models. Effect sizes for these models ranged from negligible ( $r = .00$ ) to small ( $r = .21$ ), with a small average effect size (M semipartial  $r = .08$ ,  $SD = .05$ ). Adding the interaction parameter resulted in a significant improvement in LOO (95% CIs excluded 0) in 2/18 (11.11%) of models. Thus, accounting for spatial autocorrelation weakens the interaction effect, but does not abolish it entirely.

There still remain some limitations of these analyses. First, I dealt with missing data via listwise deletion, following the original authors. But this approach is [not advised](#) unless data are Missing Completely At Random or sample sizes are sufficiently large. Future analyses of these data could consider approaches like Bayesian imputation or multiple imputation (imputation would work well with the high correlations within IQ and Religiosity variables). Second, no measurement error is included on the IQ variables, despite them being country-level average scores. Including sufficiently large standard errors around these averages into the model would likely reduce the strength of the associations we see.

The R code used for analysis and exact results of all models are available at: <https://osf.io/wjg45/>. If you use this analysis code, please reference as:

Claessens, S. (2019). Controlling for spatial autocorrelation in "Declines in Religiosity Predict Increases in Violent Crime Among Low IQ Countries Only".

### **Data Auditor Report**

#### **Multiverse Reanalysis of *Declines in Religiosity Predict Increases in Violent Crime Among Low IQ Countries Only***

By Cindel J. M. White

A copy of the manuscript and data were provided for an independent attempt to re-create the multiverse analysis reported in Study 2. Original analyses were performed in SPSS, and all re-analyses were performed in R (version 3.4.3, R Core Team, 2017), including rescaling variables (standardizing and dummy coding) from the raw data. The R code used for analysis and exact results of all models are available at: <https://osf.io/v79gm/>. If you use this analysis code, please reference as:

White, C. J. M. (2019). Multiverse reanalysis of "Declines in Religiosity Predict Increases in Violent Crime Among Low IQ Countries Only". doi:10.17605/OSF.IO/V79GM

The first set of re-analyses attempted to replicate the multiverse of 171 regressions summarized in Study 2, in which each country's homicide rate was predicted by (a) one of three operationalizations of religiosity, (b) one of the three operationalizations of IQ, (c) the relevant interaction, and (d) all possible combinations of control variables (including three additional models that included all controls plus, in separate regressions, the interaction between religiosity and GDP, religiosity and income inequality, and religiosity and educational attainment). This resulted in a multiverse of 171 possible regression models. All variables were standardized prior to analysis, except for GDP, which was square root transformed prior to analysis (except for in models that included the interaction between GDP and religiosity, where GDP was also standardized). Missing data was handled through listwise deletion. These analyses indicated an average interaction effect of  $b = .53$  (Supplemental Figure 3). Across all analyses, 66.1% of p-values were below .001, 88.9% of p-values were below .01, 97.7% of p-values were below .05 (see Supplemental Figure 4).

*Supplemental Figure 3. Standardized interaction effect size across a multiverse of regression models.*

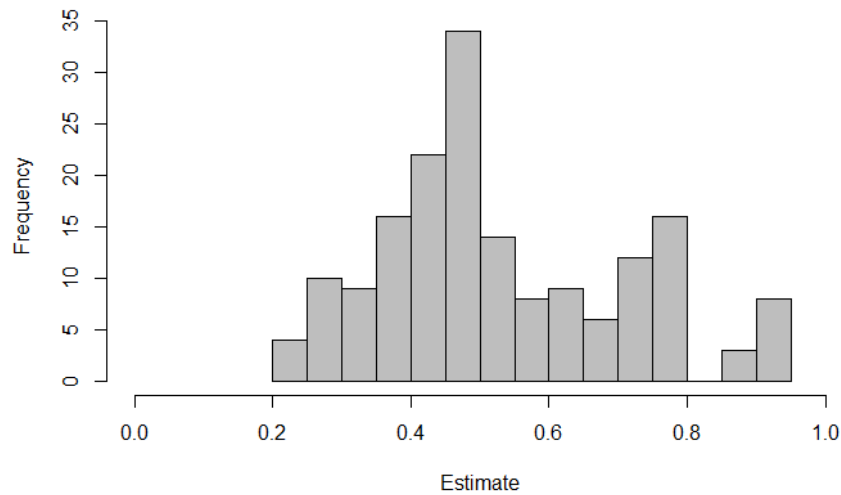

*Supplemental Figure 4. P-values across a multiverse of regression models.*

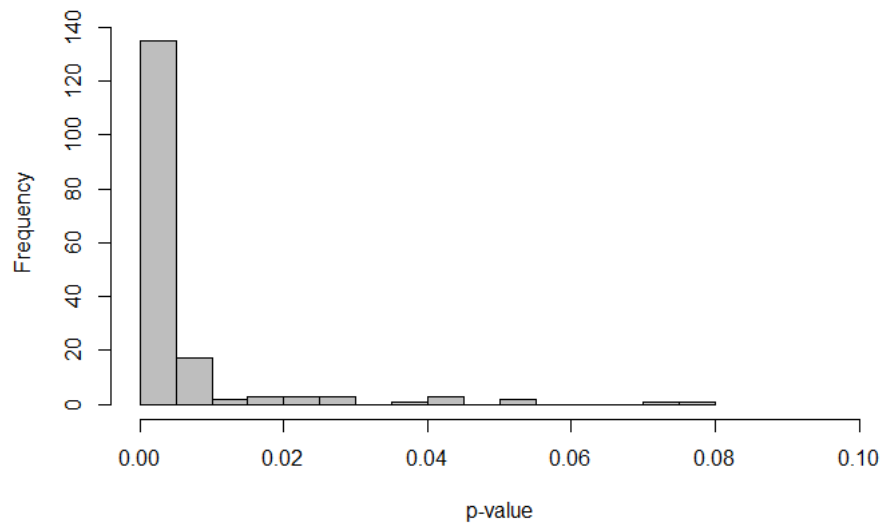

A second set of re-analyses replicated the same 171 combinations of primary and control variables, but used dummy coded indicators of each operationalization of religiosity and IQ (based on a median split: 0 = below median, 1 = above median), rather than a standardized continuous measure of these variables. Control variables were rescaled in the same manner as previously, and missing data was handled through listwise deletion. These analyses indicated an

average interaction effect of  $b = 1.17$  (Supplemental Figure 5). Across all analyses, 48.5% of p-values were below .001, 73.7% of p-values were below .01, 85.4% of p-values were below .05 (see Supplemental Figure 6). These two sets of analyses therefore provide strong support for the hypothesized interaction effect's robustness to alternative analysis strategies.

*Supplemental Figure 5. Interaction effect size across a multiverse of regression models based on a median split of religiosity and IQ variables.*

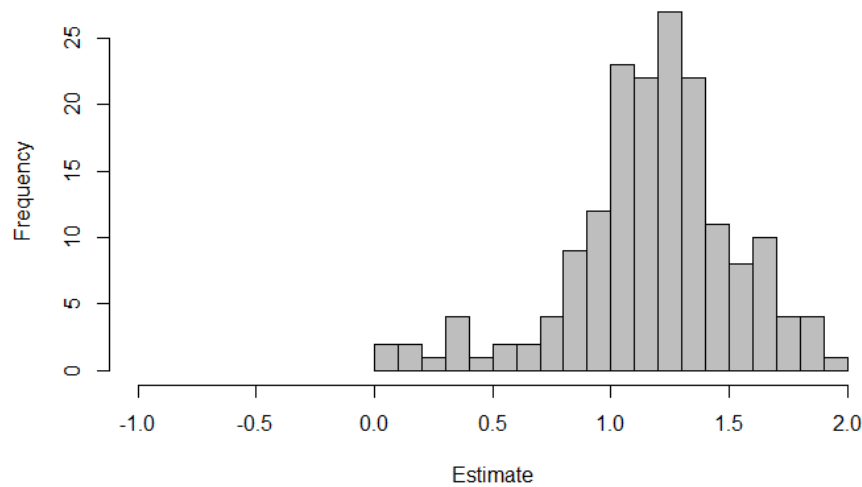

*Supplemental Figure 6. P-values across a multiverse of regression models, based on a median split of religiosity and IQ variables.*

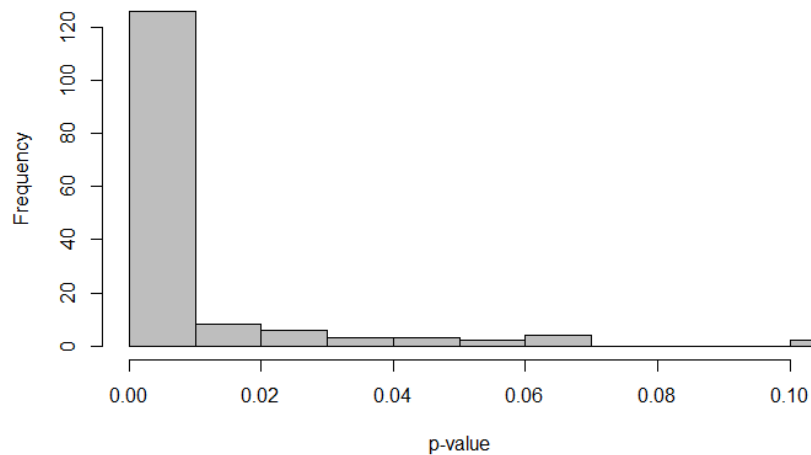

### Testing Potential Mechanisms

As noted in the main text, we do not know *why* religion appears to have greater utility in deterring violence in countries with relatively low average IQs. We speculated that perhaps having a relatively intelligent society contributes to highly functional group-level institutions and norms which may help regulate behavior even in the absence of religion. We were hesitant to test any specific possible mechanisms for numerous reasons. First, we suspect there are multiple mechanisms that likely are related to one another in multiple, complicated ways. Second, every additional variable included in our models reduces our (already limited) sample of overlapping estimates and adds measurement error. Third, we would not know how to select among the many possible variables we could test. However, two reviewers suggested liberalism or Democracy, and we were aware that Democracy was highly related to one of our explicitly speculated mechanisms: Rule of Law. For these reasons, we decided to test these two variables as potential mechanisms in exploratory analyses.

### Method

These analyses were preregistered: <http://aspredicted.org/blind.php?x=sq8ph9>. We followed this preregistration exactly. Specifically, we planned to run 18 additional regressions, controlling for either Rule of Law or Democracy (separately), in each of the 9 possible full models (controlling for GDP, income inequality, population density, and educational attainment). If and only if adding Rule of Law or Democracy to the models substantially reduced the size of the interaction effect, we would then conduct moderated mediations. We used the World Bank's Rule of Law Index (2019; part of their World Governance Indicators series) and the Economist Intelligence Unit's (2010) Democracy Rankings. As stated in the preregistration, regardless of

how the results turned out, we would consider them only suggestive and not at all conclusive evidence for or against either proposed mechanism.

## Results

Despite that stronger Rule of Law consistently significantly predicted lower homicide rates across all nine models (semipartial  $r_s = -.180 - -.282, p_s < .045$ ), adding Rule of Law to the models had little influence on the size of the interaction effect (semipartial  $r_s = .133 - .381, p_s < .137$ ). Unlike Rule of Law, Democracy was not a significant predictor in any models (semipartial  $r_s = -.022 - .134, p_s > .102$ ), but also had very little influence on the size of the interaction effect (semipartial  $r_s = .230 - .423, p_s < .009$ ).

## Discussion

As we stated in the preregistration, we do not think these results rule democracy or rule of law out as potential mechanisms. They might suggest, at minimum, that rule of law (or democracy) *alone* probably does not account for the observed interaction effect. However, it is still possible that some combination of variables, including democracy or rule of law might explain the observed interaction effect. Given the consistent effect of rule of law, we hope future researchers will consider this variable in their future explorations of these data, as we do feel this is a very plausible mechanism (if not alone, then perhaps with other variables).

## **Pre-peer Review Methods and Results of Study 2**

### **Method**

Study 2 examined the interaction between country-level IQ and religiosity on homicide rates. All countries for which the relevant data could be obtained were included. Given that there is no objective best measure of religiosity nor an objective best list of relevant control variables, we conducted a multiverse analysis using three different operationalizations of religiosity and all possible combinations of five control variables. Multiverse analysis reports all (or at least many) of the conceivable statistical models to eliminate researcher degrees of freedom (Steegen, Tuerlinkx, Gelman, & Vanpaemel, 2016). Thus, religiosity was operationalized as the percent of the population affiliated with any religion (Pew Research Center, 2012), the percent of the population that practices religion (ARDA; Maoz & Henderson, 2013), and the percent of the population that reports that religion is an important part of their daily life (Gallup, 2009). Average IQ estimates by country were drawn from Lynn and Vanhanen (2002; 2006; see Study 1 Methods for discussion of the validity of these data). Per capita homicide rates were drawn from the United Nations Office on Drugs and Crime (UNODC; most recent available year of data was used [majority from 2012]). To our knowledge, these two sources provide the best available estimates for IQ and homicide rates, and so no other operationalizations of these variables were included in the multiverse analysis.

In all possible combinations, we controlled for various other factors generally regarded to be related to homicide rates: average yearly temperature (The World Bank, 2011), Gross Domestic Product per capita (GDP) and the Gini index of income inequality (2015 CIA World Factbook; latest available estimates were used where 2015 estimates were not available), population density (The World Bank, 2015), and parasite stress (Fincher & Thornhill, 2012).

This produced 96 possible statistical models with 129 to 183 countries for the Pew analyses, 127 to 178 countries for the ARDA analyses, and 118 to 139 countries for the Gallup analyses. All variables were  $z$ -transformed prior to analysis.<sup>1</sup>

## Results

**Correlations.** As can be seen in the correlation matrix (Table 2), higher homicide rates were associated with lower IQ and GDP and higher income inequality, temperature, and parasite stress. Higher homicide rates were unrelated to population density and either unrelated (ARDA and Pew) or positively associated (Gallup) with religiosity. Higher IQ was associated with higher GDP and population density and lower religiosity, income inequality, temperature, and parasite stress. Higher religiosity was positively associated with income inequality, temperature, and parasite stress, negatively correlated with GDP, and unrelated to population density.

---

<sup>1</sup> Square root transforming GDP (as in Study 1) instead of  $z$ -transforming did not alter the results.

Table 2.

*Correlation matrix for Study 2.*

|                        |          | Homicide<br>Rate | 2     | 3     | 4     | 5     | 6     | 7     | 8     | 9     |
|------------------------|----------|------------------|-------|-------|-------|-------|-------|-------|-------|-------|
| IQ (2)                 | <i>r</i> | -.386            |       |       |       |       |       |       |       |       |
|                        | <i>p</i> | <.001            |       |       |       |       |       |       |       |       |
| ARDA Religiosity (3)   | <i>r</i> | .082             | -.501 |       |       |       |       |       |       |       |
|                        | <i>p</i> | .259             | <.001 |       |       |       |       |       |       |       |
| Pew Religiosity (4)    | <i>r</i> | .101             | -.490 | .870  |       |       |       |       |       |       |
|                        | <i>p</i> | .135             | <.001 | <.001 |       |       |       |       |       |       |
| Gallup Religiosity (5) | <i>r</i> | .244             | -.723 | .715  | .730  |       |       |       |       |       |
|                        | <i>p</i> | .003             | <.001 | <.001 | <.001 |       |       |       |       |       |
| GDP (6)                | <i>r</i> | -.240            | .526  | -.255 | -.283 | -.479 |       |       |       |       |
|                        | <i>p</i> | <.001            | <.001 | <.001 | <.001 | <.001 |       |       |       |       |
| Income Inequality (7)  | <i>r</i> | .509             | -.485 | .340  | .184  | .505  | -.369 |       |       |       |
|                        | <i>p</i> | <.001            | <.001 | <.001 | .031  | <.001 | <.001 |       |       |       |
| Population Density (8) | <i>r</i> | -.102            | .222  | -.041 | -.106 | -.103 | .377  | .088  |       |       |
|                        | <i>p</i> | .144             | .003  | .579  | .125  | .220  | <.001 | .303  |       |       |
| Temperature (9)        | <i>r</i> | .328             | -.692 | .502  | .471  | .725  | -.346 | .522  | .075  |       |
|                        | <i>p</i> | <.001            | <.001 | <.001 | <.001 | <.001 | <.001 | <.001 | .330  |       |
| Parasite Stress        | <i>r</i> | .328             | -.676 | .394  | .296  | .708  | -.576 | .561  | -.132 | .695  |
|                        | <i>p</i> | <.001            | <.001 | <.001 | <.001 | <.001 | <.001 | <.001 | .071  | <.001 |

Bold indicates traditional standards of statistical significance.

**Multiverse analysis.** In 96 separate regressions, homicide rates were regressed on one of the three operationalizations of religiosity, IQ, and the interaction, independently and with every possible combination of the five control variables, excluding listwise. As can be seen in Figure 1, across all possible models, the effect sizes for the interaction between religiosity and IQ ranged from small, semipartial  $r = .11$ , to medium/large, semipartial  $r = .39$  (Cohen, 1992), with a small to medium average effect size ( $M$  semipartial  $r = .24$ ,  $SD = .07$ ). The interaction was statistically significant ( $p < .05$ ) in 83.3% of all possible models and marginal ( $p < .10$ ) in 87.5% of all possible models. The interaction in all ARDA models, semipartial  $rs = .26-.39$ ,  $ps < .001$ , and all Pew models, semipartial  $rs = .21-.28$ ,  $ps < .001-.004$ , was statistically significant at  $ps < .005$ .<sup>2</sup> Only in the Gallup models (which had the fewest included countries) did the interaction occasionally fail to reach statistical significance, but it was always within the range of a small to medium effect size, semipartial  $rs = .11-.27$ ,  $ps < .001-.177$ .<sup>3</sup>

---

<sup>2</sup> ARDA and Gallup religiosity were skewed, so analyses were re-run omitting countries more than 3 SDs below the mean (Czech Republic, Estonia, and South Korea for ARDA, and these three plus Japan for Pew). This did not affect the effect size or statistical significance of the IQ by ARDA religiosity interaction with or without controls, semipartial  $rs = .28-.36$ ,  $ps < .001$ , nor the IQ by Pew religiosity interaction with or without controls, semipartial  $rs = .22$ ,  $ps < .004$ .

<sup>3</sup> To ensure the results were not influenced by a lack of representation of certain combinations of religiosity and IQ (e.g., high religiosity and high average IQ or low religiosity and low average IQ), we performed median splits on religiosity and IQ and cross-checked the interactions in 2 x 2 ANOVAs. All three interactions (IQ by ARDA, Pew, and Gallup) were statistically significant,  $ps < .001$ , with medium to large effect sizes,  $\eta_p^2s = .124-.202$ . In the low IQ country group, high religiosity countries consistently had lower homicide rates than low religiosity countries,  $ps < .001$ . In the high IQ country group, there were no differences between high and low religiosity groups on homicide rates,  $ps > .197$  (nor were the differences in the same direction across the three measures of religiosity).

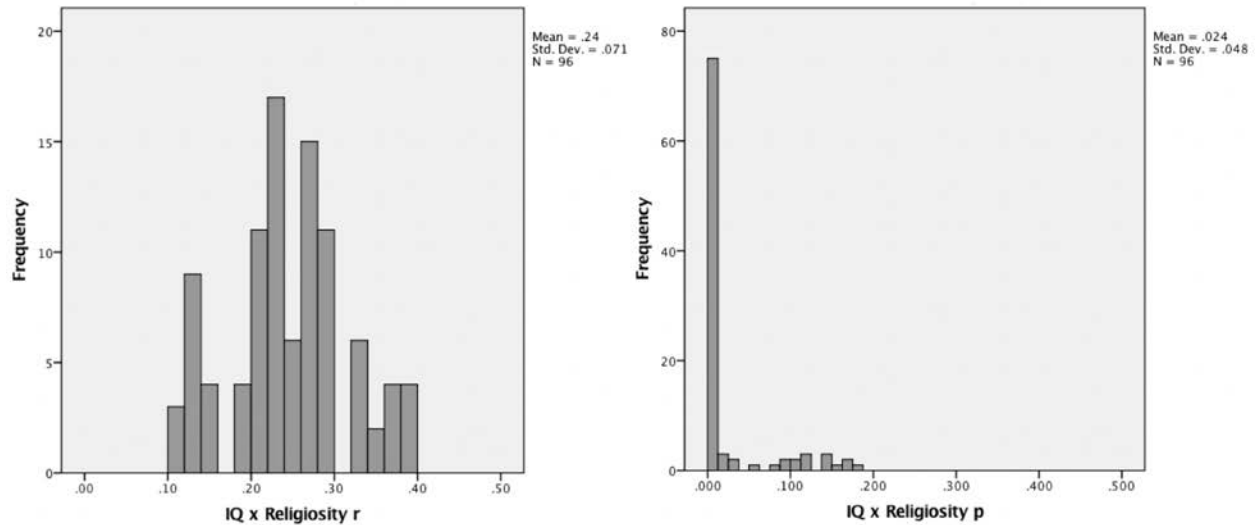

Figure 1. Multiverse analysis histograms of semipartial  $r$ s and  $p$ -values for the interaction between religiosity and IQ.

These main analyses were also cross-checked with Lynn and Meisenberg's (2010) data, which had a more limited sample, but also contained an IQ data quality variable, which was included as an additional control. With these data, the IQ by ARDA religiosity interaction was significant without controls ( $n = 101$ ; semipartial  $r = .30$ ,  $p < .001$ ) and with all controls ( $n = 74$ ; semipartial  $r = .23$ ,  $p = .012$ ), the IQ by Pew religiosity interaction was significant without controls ( $n = 104$ ; semipartial  $r = .19$ ,  $p = .027$ ) and with all controls ( $n = 74$ ; semipartial  $r = .26$ ,  $p = .005$ ), and the IQ by Gallup religiosity interaction was significant without controls ( $n = 91$ ; semipartial  $r = .21$ ,  $p = .029$ ) and with all controls ( $n = 70$ ; semipartial  $r = .23$ ,  $p = .013$ ). In every case, the IQ by religiosity interaction effect size was in the small to medium range (very similar to the results of the multiverse analysis).

**Sample model.** Because the Pew results produced the most moderate estimates of the religiosity x IQ effect size, we expanded this model for purposes of graphing the interaction. In a stepwise regression ( $n = 129$  countries), homicide rates were regressed on Pew religiosity, IQ, and the interaction first, and then again controlling for GDP, Gini, population density, average

yearly temperature, and parasite stress, excluding listwise. As can be seen in Table 3, higher average IQ significantly predicted lower homicide rates (semipartial  $r = -.43$ ),  $p < .001$ , which maintained a small but not statistically significant effect size with covariates (semipartial  $r = -.12$ ),  $p = .103$ . Higher religiosity also predicted lower homicide rates without covariates (semipartial  $r = -.30$ ),  $p < .001$ , and with covariates (semipartial  $r = -.26$ ),  $p = .001$ .

Consistent with our hypothesis, there was a small to medium significant IQ by religiosity interaction without covariates (semipartial  $r = .27$ ),  $p = .001$ , and with covariates (semipartial  $r = .22$ ),  $p = .004$ . As can be seen in Figure 2, simple slopes one standard deviation above and below the overall mean of IQ indicated that in countries with relatively high average IQ ( $IQ \approx 96$ ), there was a small relationship between higher religiosity and lower homicide rates ( $b = -.19$ ),  $t = -2.14$ ,  $p = .035$ , but in countries with lower average IQ ( $IQ \approx 73$ ), this relationship was much larger ( $b = -.91$ ),  $t = -3.39$ ,  $p = .001$ . It may be worth noting that although all included variables except population density were correlated with homicide rates, only religiosity, the IQ by religiosity interaction, and income inequality remained significant predictors of homicide rates in the full model, each of which had small to medium effect sizes. The relationship between lower GDP and higher homicide rates was small to non-existent (semipartial  $r = -.05$ ),  $p = .469$ , and the relationships between average yearly temperature and parasite stress with homicide rates were virtually zero (semipartial  $rs < .01$ ),  $ps > .902$ .

Table 3.

*Homicide rate regressed on IQ, Pew religiosity, their interaction and relevant controls in the initial multiverse.*

|                       | $F$   | $R^2$ | $\beta$ | $t$    | $p$   | 95% CI       | Semi-partial $r$ |
|-----------------------|-------|-------|---------|--------|-------|--------------|------------------|
| Homicide Rate (Model) | 13.62 | .245  |         |        | <.001 |              |                  |
| IQ                    |       |       | -.495   | -5.511 | <.001 | -.737, -.347 | -.427            |

|                         |      |      |  |  |  |  |
|-------------------------|------|------|--|--|--|--|
| Religiosity             |      |      |  |  |  |  |
|                         |      |      |  |  |  |  |
| <b>IQ x Religiosity</b> |      |      |  |  |  |  |
| Homicide Rate (Model)   | 8.30 | .354 |  |  |  |  |
| IQ                      |      |      |  |  |  |  |
| Religiosity             |      |      |  |  |  |  |
| <b>IQ x Religiosity</b> |      |      |  |  |  |  |
| GDP                     |      |      |  |  |  |  |
| Gini                    |      |      |  |  |  |  |
| Population Density      |      |      |  |  |  |  |
| Temperature             |      |      |  |  |  |  |
| Parasite Stress         |      |      |  |  |  |  |

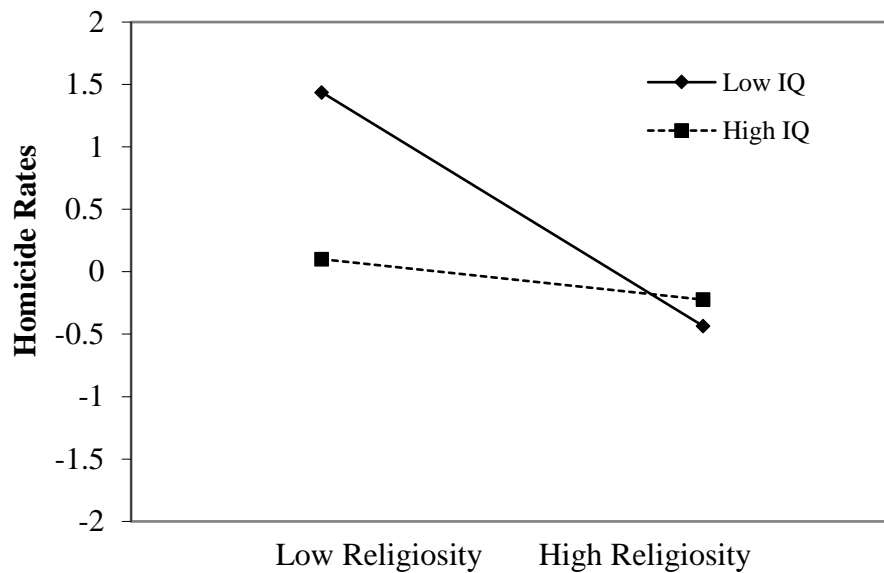

Figure 2. Interaction between IQ and religiosity on homicide rates with controls in Study 2.

## Additional References

(only those not included in the main text but cited in supplement)

Economist Intelligence Unit (2010). Democracy index 2010. Retrieved from:

[http://graphics.eiu.com/PDF/Democracy\\_Index\\_2010\\_web.pdf](http://graphics.eiu.com/PDF/Democracy_Index_2010_web.pdf)

Fincher, C. L., & Thornhill, R. (2012). Parasite-stress promotes in-group assortative sociality:

The cases of strong family ties and heightened religiosity. *Behavioral and Brain Sciences*, 35, 61-79. <sup>[11]</sup><sub>SEP</sub>

Lynn, R., & Meisenberg, G. (2010). National IQs calculated and validated for 108 nations. *Intelligence*, 38, 353-360.

Lynn, R., & Vanhanen, T. (2002). *IQ and the wealth of nations*. Westport, CT: Praeger.

Lynn, R., & Vanhanen, T. (2006). *IQ and global inequality*. Washington: Summit Publishers.

World Economic Forum (2017). *Travel and Tourism Competitiveness Report*. Retrieved from

<http://reports.weforum.org/travel-and-tourism-competitiveness-report-2017/downloads/>

The World Bank. (2011). *Climate Change Knowledge Portal: Historical Data*. Retrieved from

[http://data.worldbank.org/data-catalog/cckp\\_historical\\_data](http://data.worldbank.org/data-catalog/cckp_historical_data)

The World Bank. (2019). World Governance Indicators. Retrieved from

<https://info.worldbank.org/governance/wgi/#home>
